# Supplementary material
Source: publisher figshare collection journal article supplement (https://acs.figshare.com/ndownloader/files/5745561)
Supplement: Supplementary file 1 [file 5745561]

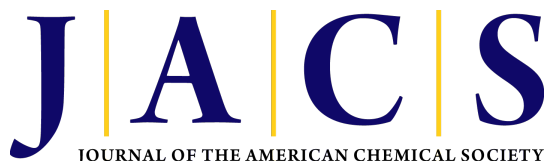

JOURNAL OF THE AMERICAN CHEMICAL SOCIETY

J. Am. Chem. Soc., 1996, 118(10), 2400-2410, DOI: [10.1021/ja9504505](https://doi.org/10.1021/ja9504505)

#### Terms & Conditions

Electronic Supporting Information files are available without a subscription to ACS Web Editions. The American Chemical Society holds a copyright ownership interest in any copyrightable Supporting Information. Files available from the ACS website may be downloaded for personal use only. Users are not otherwise permitted to reproduce, republish, redistribute, or sell any Supporting Information from the ACS website, either in whole or in part, in either machine-readable form or any other form without permission from the American Chemical Society. For permission to reproduce, republish and redistribute this material, requesters must process their own requests via the RightsLink permission system. Information about how to use the RightsLink permission system can be found at <http://pubs.acs.org/page/copyright/permissions.html>

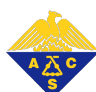

ACS Publications

MOST TRUSTED. MOST CITED. MOST READ.

Copyright © 1996 American Chemical Society

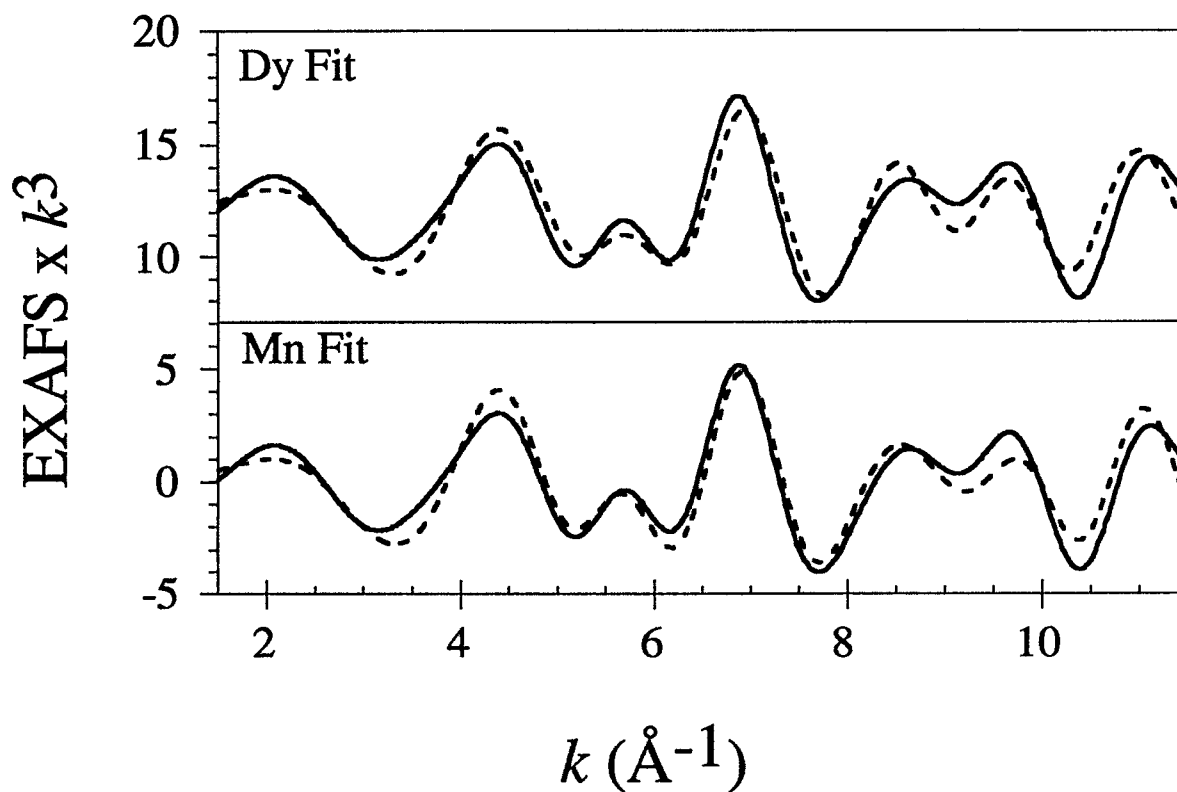

Figure S1: Representative fits to an untreated control S<sub>1</sub> sample corrected for detector deadtime response. Both fits (dashed lines) are 3 shell fits to the same filtered data (solid lines) over a wide range in the Fourier transforms (0.8-3.3 Å). The top frame uses a Mn•••Dy interaction to model the third shell while the bottom frame uses a Mn•••Mn interaction. Fitting results are summarized in Table 3 of the text.

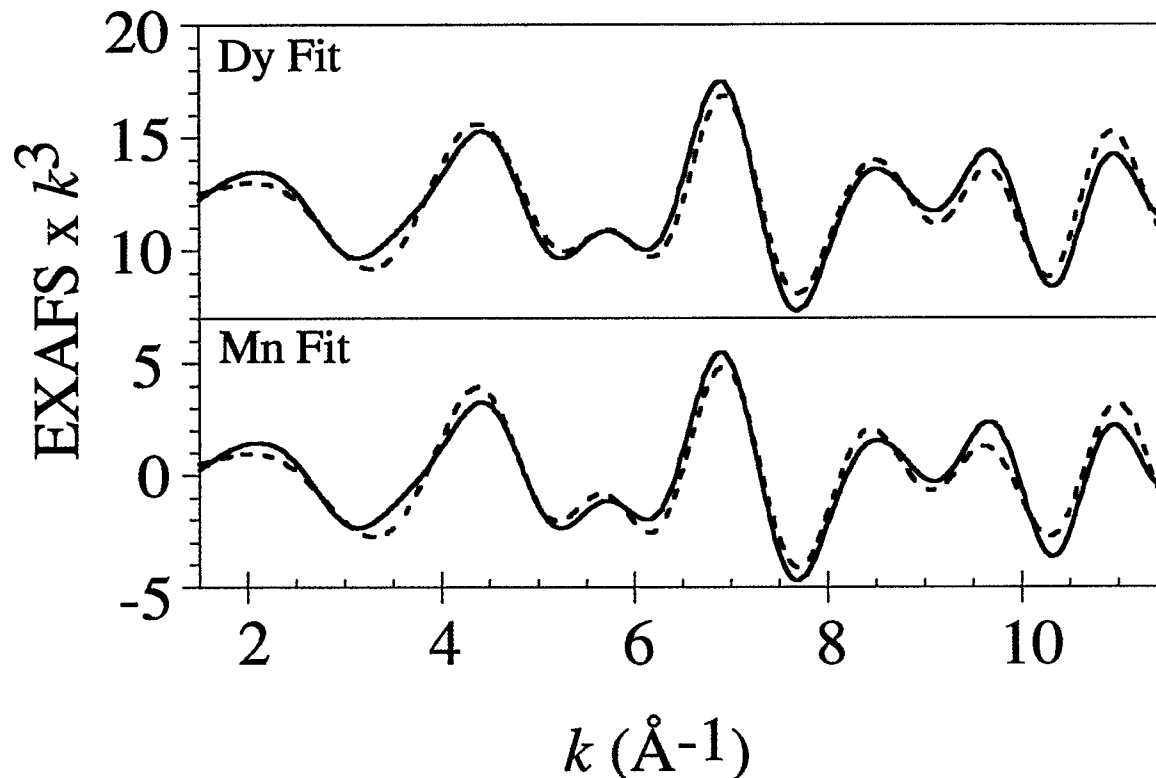

Figure S2: Representative fits to a  $\text{Dy}^{3+}$ -substituted sample corrected for detector deadtime response. Both fits (dashed lines) are 3 shell fits to the same filtered data (solid lines) over a wide range in the Fourier transforms ( $0.8\text{--}3.3 \text{ \AA}$ ). The top frame uses a  $\text{Mn}\cdots\text{Dy}$  interaction to model the third shell while the bottom frame uses a  $\text{Mn}\cdots\text{Mn}$  interaction. Fitting results are summarized in Table 3 of the text.
